# Supplementary material
Source: PubMed Central journal article supplement (PMC10131590)
Supplement: mmc1.pdf [file mmc1.pdf]

## **Fructose consumption from different food sources and cardiometabolic biomarkers: cross-sectional associations in US men and women**

Xinyi Li, Hee-Kyung Joh, Jinhee Hur, Mingyang Song, Xuehong Zhang, Yin Cao, Kana Wu, Edward L. Giovannucci

Supplementary Figure 1. Flowchart describing how study population was generated

Supplementary Figure 2. Percentage differences (95% confidence intervals) in biomarker concentrations associated with 20 g/d fructose intake stratified by (A) physical activity quartiles and (B) BMI categories

Supplementary Figure 3. Percentage differences (95% confidence intervals) in biomarker concentrations associated with 20 g/d fructose intake stratified by (A) age (B) smoking status and (C) alcohol consumption

Supplementary Table 1. Top 10 food contributors of fructose in each cohort

Supplementary Table 2. Characteristics of participants at blood draw according to quartiles of SSB fructose, juice fructose and fruit fructose in the combined cohort

Supplementary Table 3. Biomarker concentrations according to total fructose quartiles in HPFS, NHS and NHSII

Supplementary Table 4. Percentage of differences (95% CIs) in biomarker concentrations associated with 20 g/d total fructose in sensitivity analyses

Supplementary Table 5. Percentage of differences (95% CIs) in biomarker concentrations associated with 20 g/d of fructose from SSB, juice and fruit in the combined cohort with additional adjustment for fiber intake

Supplementary Table 6. Percentage of differences (95% CIs) in biomarker concentrations associated with 20 g/d of fructose from SSB, juice and fruit in the combined cohort not adjusted for BMI

Supplementary Table 7. Percentage of differences (95% CIs) in biomarker concentrations associated with 20 g/d of fructose from SSB, juice and fruit in HPFS

Supplementary Table 8. Percentage of differences (95% CIs) in biomarker concentrations associated with 20 g/d of fructose from SSB, juice and fruit in NHS

Supplementary Table 9. Percentage of differences (95% CIs) in biomarker concentrations associated with 20 g/d of fructose from SSB, juice and fruit in NHSII

Supplementary Figure 1. Flowchart describing how study population was generated. CVD, cardiovascular diseases.

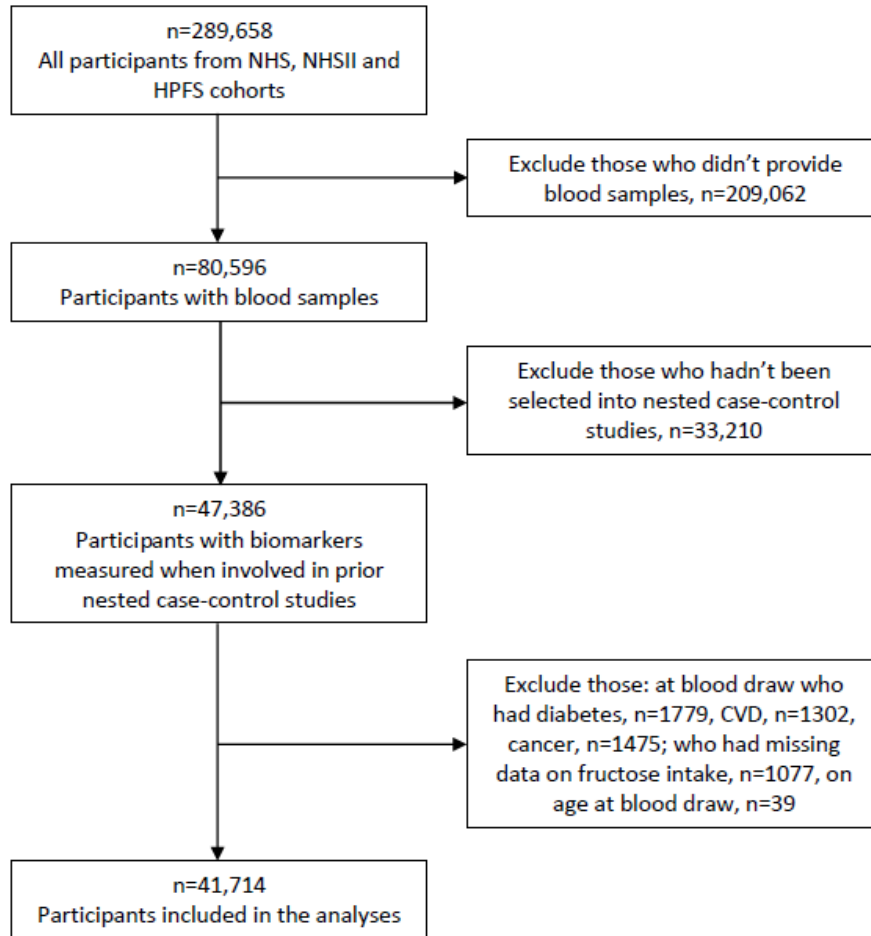

Supplementary Table 1. Top 10 food contributors of fructose in each cohort <sup>1</sup>

| HPFS                                                            |       | NHS                                                             |       | NHSII                                                           |      |
|-----------------------------------------------------------------|-------|-----------------------------------------------------------------|-------|-----------------------------------------------------------------|------|
| Apple                                                           | 10.7% | Apple                                                           | 11.0% | Apple                                                           | 9.2% |
| Orange juice                                                    | 9.2%  | Orange juice                                                    | 10.3% | Hawaiian Punch, lemonade, and other non-carbonated fruit drinks | 8.5% |
| Banana                                                          | 5.5%  | Banana                                                          | 5.1%  | Orange juice                                                    | 7.9% |
| Coke, Pepsi, and other cola with sugar                          | 5.0%  | Hawaiian Punch, lemonade, and other non-carbonated fruit drinks | 4.3%  | Coke, Pepsi, and other cola with sugar                          | 5.8% |
| Hawaiian Punch, lemonade, and other non-carbonated fruit drinks | 3.2%  | Coke, Pepsi, and other cola with sugar                          | 4.1%  | Banana                                                          | 4.5% |
| Grape and raisin                                                | 3.2%  | Orange                                                          | 3.2%  | Grape and raisin                                                | 3.9% |
| Orange                                                          | 3.1%  | Grape and raisin                                                | 3.1%  | Other fruit juices                                              | 2.3% |
| Other carbonated beverage with sugar                            | 2.5%  | Apple sauce                                                     | 2.4%  | Orange                                                          | 2.1% |
| Apple juice                                                     | 1.9%  | Cantaloupe                                                      | 1.8%  | Other carbonated beverage with sugar                            | 2.0% |
| Apple sauce                                                     | 1.7%  | Apple juice                                                     | 1.8%  | Apple juice                                                     | 1.7% |

<sup>1</sup> The contribution was calculated as weight percentage of total fructose and ranked in decreasing order.

Supplementary Table 2. Characteristics of participants at blood draw according to quartiles of SSB fructose, juice fructose and fruit fructose in the combined cohort <sup>1</sup>

|                                               | SSB fructose           |                        | Juice fructose         |                        | Fruit fructose         |                        |
|-----------------------------------------------|------------------------|------------------------|------------------------|------------------------|------------------------|------------------------|
|                                               | Quartile 1<br>n=10,428 | Quartile 4<br>n=10,428 | Quartile 1<br>n=10,428 | Quartile 4<br>n=10,428 | Quartile 1<br>n=10,428 | Quartile 4<br>n=10,428 |
| Age at blood draw, y                          | 52.7 ± 9.9             | 51.0 ± 9.5             | 51.7 ± 9.7             | 52.5 ± 9.9             | 50.6 ± 9.1             | 53.3 ± 10.3            |
| Fructose intake, g/d                          | 36.5 ± 11.3            | 53.8 ± 15.3            | 37.4 ± 13.9            | 49.7 ± 13.6            | 38.1 ± 16.2            | 48.4 ± 12.1            |
| SSB fructose intake, g/d                      | 0.1 ± 0.1              | 21.0 ± 17.6            | 6.2 ± 13.1             | 7.7 ± 12.6             | 10.2 ± 16.9            | 4.1 ± 8.0              |
| Juice fructose intake, g/d                    | 5.2 ± 6.2              | 6.5 ± 6.9              | 0.6 ± 0.5              | 14.4 ± 7.3             | 5.3 ± 6.5              | 6.3 ± 6.8              |
| Fruit fructose intake, g/d                    | 13.6 ± 9.0             | 10.0 ± 7.0             | 11.8 ± 9.1             | 12.7 ± 7.9             | 4.2 ± 1.9              | 22.2 ± 7.6             |
| Percentage fructose from SSB, %               | 0.3                    | 37.1                   | 12.8                   | 13.2                   | 20.1                   | 7.3                    |
| Percentage fructose from juice, %             | 13.3                   | 12.0                   | 1.8                    | 29.8                   | 13.8                   | 12.3                   |
| Percentage fructose from fruit, %             | 36.0                   | 19.4                   | 31.9                   | 25.7                   | 12.6                   | 47.2                   |
| Percentage energy from fructose, %            | 8.3                    | 12.2                   | 8.5                    | 11.1                   | 8.7                    | 11.0                   |
| Percentage energy from total carbohydrates, % | 49.4                   | 53.1                   | 48.5                   | 53.4                   | 46.5                   | 55.1                   |
| Percentage energy from fat, %                 | 30.7                   | 30.2                   | 32.4                   | 28.7                   | 33.6                   | 27.7                   |
| Total energy intake, kcal/d                   | 1778 ± 462             | 1792 ± 493             | 1830 ± 528             | 1660 ± 431             | 1841 ± 531             | 1783 ± 487             |
| AHEI score <sup>2</sup>                       | 48.0 ± 8.9             | 42.9 ± 8.0             | 44.7 ± 9.3             | 46.8 ± 8.3             | 41.5 ± 8.2             | 49.5 ± 8.3             |
| Physical activity, MET-h/week                 | 20.6 ± 20.4            | 16.0 ± 18.0            | 18.1 ± 19.1            | 18.8 ± 19.1            | 14.9 ± 17.3            | 22.6 ± 21.0            |
| BMI, kg/m <sup>2</sup>                        | 25.8 ± 4.9             | 25.7 ± 5.1             | 26.1 ± 5.2             | 25.0 ± 4.5             | 26.0 ± 5.3             | 25.2 ± 4.5             |
| Current smokers, %                            | 8.6                    | 12.2                   | 12.0                   | 7.5                    | 17.0                   | 5.0                    |
| Pack-years of smoking among ever-smokers      | 9.2 ± 15.4             | 8.4 ± 15.2             | 11.1 ± 17.4            | 7.0 ± 13.4             | 12.5 ± 18.8            | 6.4 ± 12.2             |
| Alcohol intake, g/d                           | 7.3 ± 11.1             | 4.3 ± 7.9              | 6.4 ± 11.2             | 5.2 ± 8.4              | 8.7 ± 13.5             | 4.1 ± 6.8              |
| Hypertension, %                               | 19.1                   | 19.7                   | 17.9                   | 18.9                   | 19.4                   | 17.4                   |
| Hypercholesterolemia, %                       | 30.1                   | 32.3                   | 30.8                   | 30.8                   | 31.0                   | 30.5                   |
| Cholesterol-lowering drug use, %              | 3.9                    | 4.2                    | 3.8                    | 4.2                    | 3.8                    | 4.0                    |
| Regular aspirin or NSAID use, <sup>3</sup> %  | 52.0                   | 51.6                   | 53.8                   | 48.2                   | 53.9                   | 49.0                   |

<sup>1</sup> Values are means ± SDs for continuous variables and percentages for categorical variables unless otherwise specified. All variables were standardized by age at blood draw. MET, metabolic equivalent of task; AHEI, Alternative Healthy Eating Index; SSB, sugar-sweetened beverages; NSAID, nonsteroidal anti-inflammatory drug.

<sup>2</sup> Excluded SSB, fruit juice and fruit in the score calculation.

<sup>3</sup> Regular users were defined as ≥2 tablets of aspirin (325 mg/tablet) or NSAIDs per week.

Supplementary Table 3. Biomarker concentrations according to total fructose quartiles in HPFS, NHS and NHSII <sup>1</sup>

|                                     | HPFS (n=6858)        |                      | NHS (n=15,400)       |                      | NHSII (n=19,456)     |                      |
|-------------------------------------|----------------------|----------------------|----------------------|----------------------|----------------------|----------------------|
|                                     | Quartile 1<br>n=1714 | Quartile 4<br>n=1714 | Quartile 1<br>n=3849 | Quartile 4<br>n=3849 | Quartile 1<br>n=4864 | Quartile 4<br>n=4863 |
| <b>Insulinemic/glycemic markers</b> |                      |                      |                      |                      |                      |                      |
| C-peptide, ng/mL                    | 2.0 (1.4--2.9)       | 1.9 (1.3--2.8)       | 1.7 (1.2--2.4)       | 1.6 (1.2--2.3)       | 1.4 (1.0--1.9)       | 1.4 (1.0--2.0)       |
| HbA1c, %                            | 5.7 (5.4--5.9)       | 5.6 (5.4--5.8)       | 5.4 (5.2--5.6)       | 5.4 (5.2--5.6)       | 5.2 (5.1--5.4)       | 5.3 (5.1--5.5)       |
| <b>Inflammatory markers</b>         |                      |                      |                      |                      |                      |                      |
| CRP, mg/L                           | 1.1 (0.6--2.2)       | 0.9 (0.5--2.0)       | 1.7 (0.8--3.8)       | 1.6 (0.7--3.6)       | 0.9 (0.4--2.3)       | 0.8 (0.3--1.9)       |
| IL-6, pg/mL                         | 1.0 (0.7--1.6)       | 1.0 (0.7--1.4)       | 1.1 (0.7--1.7)       | 1.1 (0.8--1.8)       | 0.9 (0.7--1.4)       | 0.9 (0.7--1.4)       |
| TNF-R1, pg/mL                       | 1225 (1075--1495)    | 1378 (1138--1638)    | 1259 (1074--1486)    | 1323 (1120--1585)    | 1109 (956--1292)     | 1074 (960--1252)     |
| TNF-R2, pg/mL                       | 2349 (2023--2734)    | 2604 (2182--3032)    | 2471 (2074--2895)    | 2575 (2193--3052)    | 2159 (1876--2521)    | 2236 (1951--2539)    |
| ICAM-1, ng/mL                       | 246 (217--285)       | 255 (222--294)       | 241 (214--281)       | 248 (215--285)       | 230 (204--257)       | 236 (206--271)       |
| Adiponectin, ng/mL                  | 6788 (4875--9732)    | 6443 (4507--8789)    | 10475 (7753--13241)  | 10572 (7724--13345)  | 8493 (6393--11383)   | 7861 (5754--10552)   |
| Leptin, ng/mL                       | 7.6 (4.7--11.5)      | 6.3 (3.9--10.0)      | 24.2 (14.1--39.4)    | 22.0 (11.9--36.1)    | 19.4 (12.6--30.4)    | 17.7 (11.4--28.5)    |
| <b>Lipid markers</b>                |                      |                      |                      |                      |                      |                      |
| TC, mg/dL                           | 202 (180--227)       | 199 (172--223)       | 220 (194--246)       | 223 (196--249)       | 195 (173--219)       | 192 (172--218)       |
| HDL-C, mg/dL                        | 44 (37--55)          | 41 (35--49)          | 61 (51--73)          | 58 (48--69)          | 62 (52--75)          | 58 (50--67)          |
| LDL-C, mg/dL                        | 127 (106--148)       | 126 (104--148)       | 136 (112--162)       | 140 (118--163)       | 109 (90--128)        | 109 (94--132)        |
| TG, mg/dL                           | 121 (80--175)        | 123 (89--171)        | 106 (78--149)        | 113 (81--158)        | 90 (64--133)         | 91 (65--135)         |
| TG/HDL-C ratio                      | 2.8 (1.6--4.5)       | 3.0 (1.9--4.7)       | 1.8 (1.2--2.7)       | 2.0 (1.3--3.0)       | 1.3 (0.9--2.1)       | 1.5 (1.0--2.2)       |

<sup>1</sup>CRP, C-reactive protein; IL-6, interleukin 6; TNF-R1, tumor necrosis factor receptor 1; TNF-R2, tumor necrosis factor receptor 2; ICAM-1, intracellular adhesion molecule 1; TC, total cholesterol; HDL-C, high-density lipoprotein-cholesterol; LDL-C, low-density lipoprotein-cholesterol; TG, triglyceride. The log-transformed biomarker concentrations were back transformed and are presented as median values (IQRs).

Supplementary Figure 2. Percentage differences (95% confidence intervals) in biomarker concentrations associated with 20 g/d fructose intake stratified by (A) physical activity quartiles (medians for quartile 1 to 4: 7.9, 19.5, 33.0 and 57.8 MET-hours/week in HPFS, 2.2, 6.7, 14.2 and 30.2 MET-hours/week in NHS, and 2.1, 7.7, 16.0 and 36.2 MET-hours/week in NHSII) and (B) BMI categories in the combined cohort (n=41,714). Models were adjusted for the same set of covariates as in Table 2.

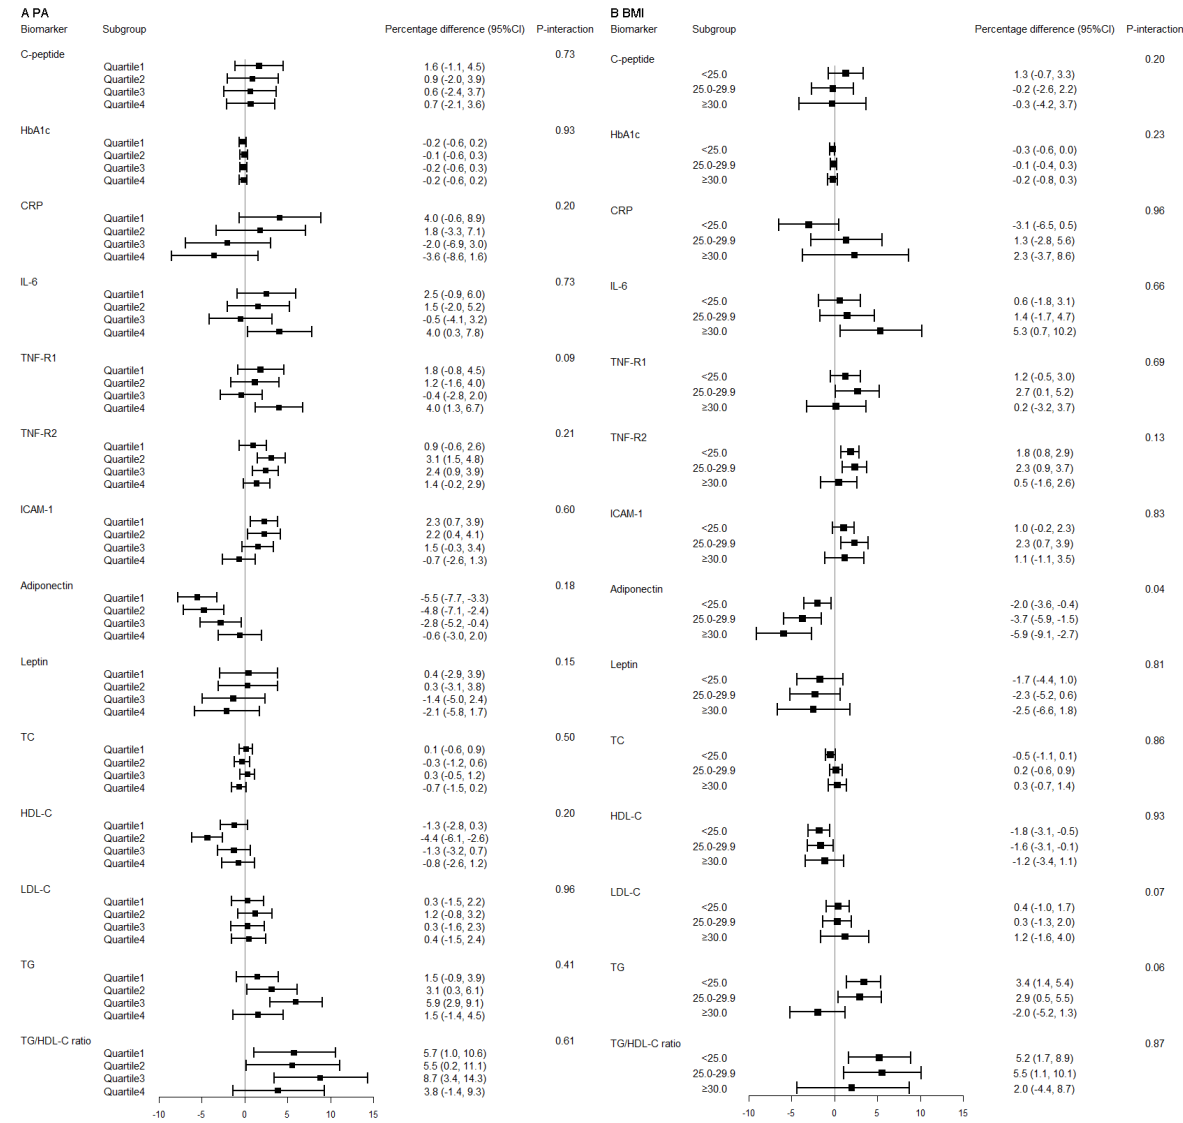

Supplementary Figure 3. Percentage differences (95% confidence intervals) in biomarker concentrations associated with 20 g/d fructose intake stratified by (A) age (B) smoking status and (C) alcohol consumption in the combined cohort (n=41,714). Models were adjusted for the same set of covariates as in Table 2.

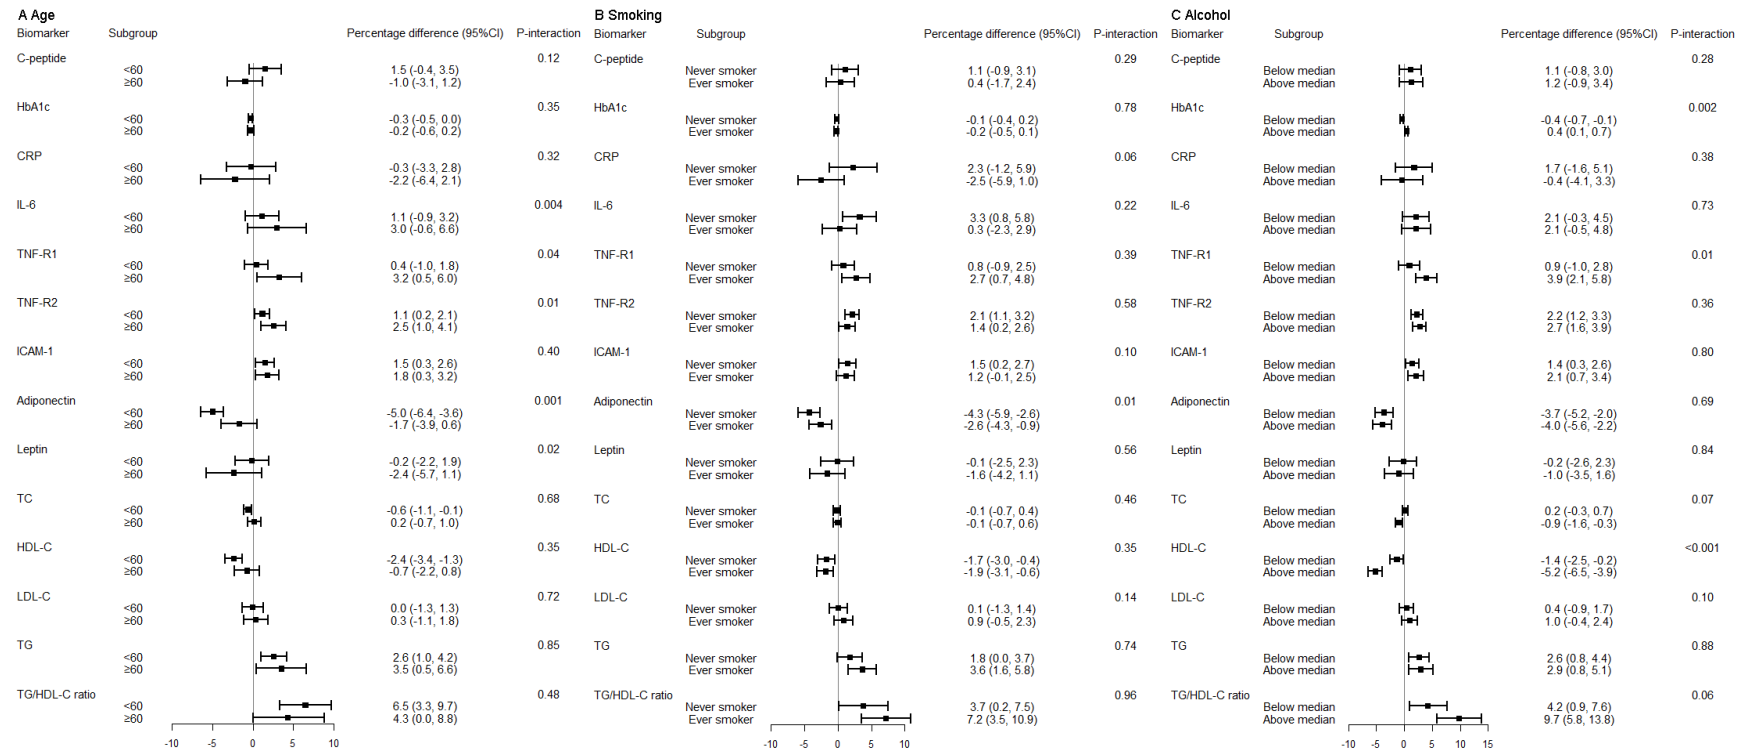

Supplementary Table 4. Percentage of differences (95% CIs) in biomarker concentrations associated with 20 g/d total fructose in sensitivity analyses <sup>1</sup>

|                                     | Among controls         | Among participants with fasting samples | Among participants without a history of hypertension or hypercholesterolemia | Among participants whose FFQ preceded blood draw by at least 1 year |
|-------------------------------------|------------------------|-----------------------------------------|------------------------------------------------------------------------------|---------------------------------------------------------------------|
| <b>Insulinemic/glycemic markers</b> |                        |                                         |                                                                              |                                                                     |
| C-peptide                           |                        |                                         |                                                                              |                                                                     |
| n                                   | 6578                   | 8960                                    | 6676                                                                         | 10,214                                                              |
| Model 1                             | -1.7 (-3.6, 0.2)       | -2.5 (-4.0, -0.9) **                    | -1.9 (-3.8, 0.0)                                                             | -2.3 (-3.9, -0.7) *                                                 |
| Model 2                             | 0.8 (-1.2, 2.8)        | 0.9 (-0.6, 2.5)                         | 1.7 (-0.3, 3.8)                                                              | 1.2 (-0.5, 2.9)                                                     |
| HbA1c                               |                        |                                         |                                                                              |                                                                     |
| n                                   | 5556                   | 7131                                    | 4944                                                                         | 7782                                                                |
| Model 1                             | -0.1 (-0.3, 0.1)       | 0.0 (-0.2, 0.3)                         | 0.0 (-0.3, 0.2)                                                              | -0.1 (-0.4, 0.1)                                                    |
| Model 2                             | -0.2 (-0.4, 0.0)       | -0.1 (-0.3, 0.2)                        | -0.1 (-0.3, 0.2)                                                             | -0.2 (-0.5, 0.0)                                                    |
| <b>Inflammatory markers</b>         |                        |                                         |                                                                              |                                                                     |
| CRP                                 |                        |                                         |                                                                              |                                                                     |
| n                                   | 9351                   | 11,614                                  | 9178                                                                         | 13,095                                                              |
| Model 1                             | -6.9 (-10.1, -3.7) *** | -5.9 (-8.8, -2.9) ***                   | -6.2 (-9.4, -2.9) ***                                                        | -6.6 (-9.3, -3.7) ***                                               |
| Model 2                             | -0.1 (-3.4, 3.3)       | 0.5 (-2.5, 3.5)                         | -0.3 (-3.6, 3.1)                                                             | -0.1 (-3.0, 2.8)                                                    |
| IL-6                                |                        |                                         |                                                                              |                                                                     |
| n                                   | 6169                   | 7814                                    | 6260                                                                         | 8051                                                                |
| Model 1                             | -1.0 (-3.3, 1.3)       | -0.8 (-2.8, 1.3)                        | -0.1 (-2.4, 2.2)                                                             | -2.5 (-4.6, -0.3) *                                                 |
| Model 2                             | 1.9 (-0.5, 4.3)        | 1.8 (-0.2, 4.0)                         | 1.3 (-1.0, 3.7)                                                              | 0.7 (-1.6, 3.0)                                                     |
| TNF-R1                              |                        |                                         |                                                                              |                                                                     |
| n                                   | 1987                   | 2442                                    | 1928                                                                         | 1982                                                                |
| Model 1                             | 1.5 (-0.1, 3.1)        | 2.1 (0.6, 3.7) *                        | 1.5 (-0.1, 3.1)                                                              | 3.1 (1.1, 5.1) **                                                   |
| Model 2                             | 1.5 (-0.1, 3.1)        | 1.7 (0.2, 3.2) *                        | 1.3 (-0.3, 2.9)                                                              | 2.8 (0.7, 4.8) *                                                    |
| TNF-R2                              |                        |                                         |                                                                              |                                                                     |
| n                                   | 6166                   | 7286                                    | 6055                                                                         | 7904                                                                |
| Model 1                             | 2.4 (1.4, 3.5) ***     | 2.3 (1.4, 3.2) ***                      | 3.3 (2.3, 4.3) ***                                                           | 2.8 (1.9, 3.8) ***                                                  |
| Model 2                             | 2.1 (1.0, 3.2) ***     | 1.9 (0.9, 2.8) ***                      | 2.4 (1.4, 3.4) ***                                                           | 2.3 (1.3, 3.3) ***                                                  |
| ICAM-1                              |                        |                                         |                                                                              |                                                                     |
| n                                   | 3382                   | 4188                                    | 3106                                                                         | 5264                                                                |
| Model 1                             | 0.7 (-0.5, 1.9)        | 0.2 (-0.9, 1.3)                         | 0.7 (-0.5, 1.9)                                                              | 0.2 (-0.8, 1.2)                                                     |
| Model 2                             | 2.0 (0.7, 3.2) **      | 1.3 (0.2, 2.5) *                        | 1.3 (0.0, 2.5) *                                                             | 1.3 (0.3, 2.3) *                                                    |
| Adiponectin                         |                        |                                         |                                                                              |                                                                     |
| n                                   | 7714                   | 9568                                    | 7683                                                                         | 10,583                                                              |
| Model 1                             | -2.5 (-4.0, -1.0) **   | -3.0 (-4.4, -1.5) ***                   | -3.2 (-4.8, -1.7) ***                                                        | -2.8 (-4.2, -1.4) ***                                               |
| Model 2                             | -3.0 (-4.5, -1.4) ***  | -3.2 (-4.6, -1.7) ***                   | -3.3 (-4.9, -1.8) ***                                                        | -3.3 (-4.7, -1.9) ***                                               |
| <b>Leptin</b>                       |                        |                                         |                                                                              |                                                                     |



|                |                       |                       |                       |                        |
|----------------|-----------------------|-----------------------|-----------------------|------------------------|
| n              | 5114                  | 6782                  | 5775                  | 6544                   |
| Model 1        | -6.6 (-9.4, -3.7) *** | -7.3 (-9.7, -4.9) *** | -6.2 (-8.8, -3.5) *** | -8.2 (-10.7, -5.6) *** |
| Model 2        | -0.6 (-3.0, 1.9)      | -1.8 (-3.8, 0.4)      | -1.4 (-3.7, 1.0)      | -2.0 (-4.3, 0.3)       |
| Lipid markers  |                       |                       |                       |                        |
| TC             |                       |                       |                       |                        |
| n              | 7572                  | 10,683                | 8515                  | 10,196                 |
| Model 1        | -0.5 (-1.1, 0.1)      | -0.4 (-0.9, 0.1)      | -1.1 (-1.6, -0.6) *** | -0.5 (-1.1, 0.0) *     |
| Model 2        | -0.2 (-0.8, 0.3)      | -0.2 (-0.6, 0.3)      | -0.4 (-1.0, 0.2)      | -0.1 (-0.6, 0.4)       |
| HDL-C          |                       |                       |                       |                        |
| n              | 4398                  | 5902                  | 4443                  | 7070                   |
| Model 1        | -3.4 (-4.6, -2.1) *** | -4.0 (-5.0, -2.9) *** | -3.5 (-4.7, -2.3) *** | -3.3 (-4.4, -2.3) ***  |
| Model 2        | -2.3 (-3.6, -1.0) *** | -2.1 (-3.1, -1.0) *** | -1.5 (-2.7, -0.3) *   | -1.8 (-2.8, -0.8) ***  |
| LDL-C          |                       |                       |                       |                        |
| n              | 3714                  | 4947                  | 3708                  | 5798                   |
| Model 1        | -0.1 (-1.5, 1.3)      | 0.7 (-0.4, 1.9)       | -0.4 (-1.7, 0.9)      | 0.1 (-1.0, 1.2)        |
| Model 2        | 0.0 (-1.4, 1.4)       | 0.2 (-0.9, 1.4)       | -0.1 (-1.5, 1.3)      | 0.3 (-0.8, 1.4)        |
| TG             |                       |                       |                       |                        |
| n              | 5164                  | 7430                  | 5769                  | 6680                   |
| Model 1        | 1.4 (-0.6, 3.4)       | 1.9 (0.2, 3.6) *      | 0.8 (-1.0, 2.7)       | 1.4 (-0.4, 3.3)        |
| Model 2        | 2.8 (0.9, 4.8) **     | 2.7 (1.1, 4.3) **     | 2.5 (0.7, 4.4) *      | 2.9 (1.1, 4.7) **      |
| TG/HDL-C ratio |                       |                       |                       |                        |
| n              | 2881                  | 4200                  | 3152                  | 4782                   |
| Model 1        | 5.5 (1.7, 9.5) **     | 6.2 (3.1, 9.5) ***    | 4.8 (1.4, 8.4) *      | 4.5 (1.5, 7.6) **      |
| Model 2        | 8.3 (4.4, 12.2) ***   | 6.2 (3.2, 9.3) ***    | 4.7 (1.3, 8.2) *      | 5.8 (2.8, 8.8) ***     |

<sup>1</sup> Models were adjusted for the same set of covariates as in Table 2. CRP, C-reactive protein; IL-6, interleukin 6; TNF-R1, tumor necrosis factor receptor 1; TNF-R2, tumor necrosis factor receptor 2; ICAM-1, intracellular adhesion molecule 1; TC, total cholesterol; HDL-C, high-density lipoprotein-cholesterol; LDL-C, low-density lipoprotein-cholesterol; TG, triglyceride; ref, reference. \* 0.005≤P<0.05, \*\* 0.001≤P<0.005, \*\*\* P<0.001.

Supplementary Table 5. Percentage of differences (95% CIs) in biomarker concentrations associated with 20 g/d of fructose from SSB, juice and fruit in the combined cohort with additional adjustment for fiber intake <sup>1</sup>

|                              | Total fructose        | SSB fructose          | Juice fructose         | Fruit fructose           |
|------------------------------|-----------------------|-----------------------|------------------------|--------------------------|
| Insulinemic/glycemic markers |                       |                       |                        |                          |
| C-peptide (n=12,433)         |                       |                       |                        |                          |
| Model 1                      | -2.1 (-3.5, -0.7) **  | 6.1 (4.2, 8.1) ***    | 0.0 (-3.0, 3.0)        | -11.2 (-13.1, -9.3) ***  |
| Model 2                      | 1.5 (0.1, 3.0) *      | 3.2 (1.4, 5.0) ***    | 4.0 (1.1, 6.9) *       | -5.6 (-8.0, -3.1) ***    |
| HbA1c (n=9912)               |                       |                       |                        |                          |
| Model 1                      | -0.1 (-0.3, 0.1)      | 0.1 (-0.2, 0.3)       | 0.3 (-0.1, 0.7)        | -0.4 (-0.7, -0.1) *      |
| Model 2                      | -0.1 (-0.4, 0.1)      | -0.3 (-0.6, -0.1) *   | 0.5 (0.1, 0.9) *       | 0.2 (-0.2, 0.6)          |
| Inflammatory markers         |                       |                       |                        |                          |
| CRP (n=16,810)               |                       |                       |                        |                          |
| Model 1                      | -5.9 (-8.3, -3.4) *** | 12.7 (9.3, 16.2) ***  | -8.2 (-13.1, -3.1) **  | -18.9 (-22.1, -15.6) *** |
| Model 2                      | 1.0 (-1.5, 3.6)       | 6.2 (3.2, 9.2) ***    | 2.9 (-2.0, 8.1)        | -5.2 (-9.6, -0.5) *      |
| IL-6 (n=11,011)              |                       |                       |                        |                          |
| Model 1                      | -0.7 (-2.5, 1.0)      | 5.6 (3.5, 7.8) ***    | -2.9 (-6.4, 0.7)       | -9.9 (-12.4, -7.4) ***   |
| Model 2                      | 2.1 (0.3, 3.9) *      | 2.2 (0.2, 4.2) *      | 1.8 (-1.6, 5.4)        | -3.8 (-7.1, -0.4) *      |
| TNF-R1 (n=3314)              |                       |                       |                        |                          |
| Model 1                      | 1.9 (0.6, 3.2) *      | 2.1 (0.5, 3.7) *      | 0.1 (-2.6, 2.8)        | -0.8 (-2.9, 1.3)         |
| Model 2                      | 1.7 (0.3, 3.0) *      | 0.5 (-1.0, 2.1)       | 1.2 (-1.4, 3.8)        | 0.7 (-1.9, 3.4)          |
| TNF-R2 (n=10,708)            |                       |                       |                        |                          |
| Model 1                      | 2.4 (1.6, 3.1) ***    | 3.1 (2.2, 4.0) ***    | -1.4 (-2.9, 0.2)       | 0.0 (-1.2, 1.2)          |
| Model 2                      | 1.9 (1.1, 2.7) ***    | 1.8 (0.9, 2.7) ***    | -0.6 (-2.1, 0.9)       | 1.0 (-0.5, 2.5)          |
| ICAM-1 (n=6248)              |                       |                       |                        |                          |
| Model 1                      | 0.5 (-0.4, 1.4)       | 3.0 (1.9, 4.2) ***    | -1.2 (-3.0, 0.6)       | -4.8 (-6.1, -3.5) ***    |
| Model 2                      | 1.6 (0.7, 2.6) ***    | 1.5 (0.4, 2.5) *      | 0.8 (-0.9, 2.6)        | -0.9 (-2.6, 0.8)         |
| Adiponectin (n=13,893)       |                       |                       |                        |                          |
| Model 1                      | -3.1 (-4.3, -1.9) *** | -6.2 (-7.6, -4.8) *** | -3.9 (-6.2, -1.5) **   | 3.0 (1.1, 4.9) **        |
| Model 2                      | -3.7 (-4.9, -2.5) *** | -4.1 (-5.5, -2.7) *** | -6.6 (-8.8, -4.4) ***  | 0.1 (-2.2, 2.5)          |
| Leptin (n=9831)              |                       |                       |                        |                          |
| Model 1                      | -6.4 (-8.4, -4.4) *** | 5.3 (2.7, 8.0) ***    | -9.7 (-13.8, -5.3) *** | -17.3 (-20.2, -14.4) *** |
| Model 2                      | -0.6 (-2.3, 1.2)      | 1.5 (-0.6, 3.6)       | 0.9 (-2.8, 4.7)        | -6.9 (-10.2, -3.5) ***   |
| Lipid markers                |                       |                       |                        |                          |
| TC (n=14,979)                |                       |                       |                        |                          |
| Model 1                      | -0.4 (-0.9, 0.0) *    | 0.8 (0.4, 1.3) ***    | -0.1 (-1.0, 0.8)       | -2.2 (-2.9, -1.5) ***    |
| Model 2                      | 0.0 (-0.4, 0.4)       | 0.3 (-0.2, 0.8)       | 0.2 (-0.7, 1.0)        | -0.6 (-1.4, 0.2)         |
| HDL-C (n=8623)               |                       |                       |                        |                          |
| Model 1                      | -3.6 (-4.5, -2.7) *** | -4.3 (-5.4, -3.2) *** | 0.5 (-1.4, 2.4)        | 0.3 (-1.0, 1.7)          |
| Model 2                      | -1.9 (-2.8, -1.0) *** | -2.2 (-3.3, -1.2) *** | 0.1 (-1.6, 1.8)        | 1.2 (-0.4, 2.9)          |
| LDL-C (n=7169)               |                       |                       |                        |                          |

|                         |                    |                      |                    |                       |
|-------------------------|--------------------|----------------------|--------------------|-----------------------|
| Model 1                 | 0.5 (-0.5, 1.5)    | 2.4 (1.1, 3.6) ***   | 0.6 (-1.4, 2.7)    | -2.1 (-3.5, -0.6) **  |
| Model 2                 | 0.7 (-0.2, 1.7)    | 1.5 (0.3, 2.6) *     | 0.6 (-1.3, 2.5)    | -0.6 (-2.4, 1.1)      |
| TG (n=10,234)           |                    |                      |                    |                       |
| Model 1                 | 1.6 (0.2, 3.1) *   | 6.1 (4.4, 7.8) ***   | 1.0 (-1.9, 4.1)    | -6.0 (-8.2, -3.7) *** |
| Model 2                 | 2.8 (1.4, 4.2) *** | 3.1 (1.5, 4.7) ***   | 4.9 (2.2, 7.8) *** | -1.0 (-3.7, 1.8)      |
| TG/HDL-C ratio (n=6092) |                    |                      |                    |                       |
| Model 1                 | 5.4 (2.7, 8.1) *** | 10.6 (7.3, 14.1) *** | 1.7 (-3.4, 7.2)    | -4.3 (-8.0, -0.5) *   |
| Model 2                 | 5.9 (3.3, 8.5) *** | 6.7 (3.7, 9.8) ***   | 4.7 (-0.1, 9.7)    | -0.6 (-5.1, 4.1)      |

<sup>1</sup> Models were adjusted for the same set of covariates as in Table 2 except fiber intake was additionally adjusted in Model 2, and each fructose source was mutually adjusted for other sources. CRP, C-reactive protein; IL-6, interleukin 6; TNF-R1, tumor necrosis factor receptor 1; TNF-R2, tumor necrosis factor receptor 2; ICAM-1, intracellular adhesion molecule 1; TC, total cholesterol; HDL-C, high-density lipoprotein-cholesterol; LDL-C, low-density lipoprotein-cholesterol; TG, triglyceride; ref, reference. \* 0.005≤P<0.05, \*\* 0.001≤P<0.005, \*\*\* P<0.001.

Supplementary Table 6. Percentage of differences (95% CIs) in biomarker concentrations associated with 20 g/d of fructose from SSB, juice and fruit in the combined cohort not adjusted for BMI<sup>1</sup>

|                              | Total fructose        | SSB fructose          | Juice fructose         | Fruit fructose           |
|------------------------------|-----------------------|-----------------------|------------------------|--------------------------|
| Insulinemic/glycemic markers |                       |                       |                        |                          |
| C-peptide (n=12,433)         |                       |                       |                        |                          |
| Model 1                      | -2.1 (-3.5, -0.7) **  | 6.1 (4.2, 8.1) ***    | 0.0 (-3.0, 3.0)        | -11.2 (-13.1, -9.3) ***  |
| Model 2                      | -1.9 (-3.3, -0.4) *   | 2.6 (0.8, 4.5) *      | 0.4 (-2.5, 3.3)        | -7.8 (-9.9, -5.6) ***    |
| HbA1c (n=9912)               |                       |                       |                        |                          |
| Model 1                      | -0.1 (-0.3, 0.1)      | 0.1 (-0.2, 0.3)       | 0.3 (-0.1, 0.7)        | -0.4 (-0.7, -0.1) *      |
| Model 2                      | -0.3 (-0.6, -0.1) **  | -0.3 (-0.6, -0.1) *   | 0.3 (-0.1, 0.7)        | -0.3 (-0.6, 0.0)         |
| Inflammatory markers         |                       |                       |                        |                          |
| CRP (n=16,810)               |                       |                       |                        |                          |
| Model 1                      | -5.9 (-8.3, -3.4) *** | 12.7 (9.3, 16.2) ***  | -8.2 (-13.1, -3.1) **  | -18.9 (-22.1, -15.6) *** |
| Model 2                      | -6.1 (-8.6, -3.6) *** | 5.1 (2.0, 8.4) **     | -4.7 (-9.6, 0.5)       | -10.9 (-14.7, -7.0) ***  |
| IL-6 (n=11,011)              |                       |                       |                        |                          |
| Model 1                      | -0.7 (-2.5, 1.0)      | 5.6 (3.5, 7.8) ***    | -2.9 (-6.4, 0.7)       | -9.9 (-12.4, -7.4) ***   |
| Model 2                      | -0.8 (-2.6, 1.1)      | 1.7 (-0.3, 3.8)       | -1.7 (-5.2, 1.9)       | -5.0 (-7.8, -2.1) ***    |
| TNF-R1 (n=3314)              |                       |                       |                        |                          |
| Model 1                      | 1.9 (0.6, 3.2) *      | 2.1 (0.5, 3.7) *      | 0.1 (-2.6, 2.8)        | -0.8 (-2.9, 1.3)         |
| Model 2                      | 0.7 (-0.7, 2.0)       | 0.5 (-1.1, 2.1)       | -0.4 (-3.0, 2.3)       | 0.0 (-2.2, 2.3)          |
| TNF-R2 (n=10,708)            |                       |                       |                        |                          |
| Model 1                      | 2.4 (1.6, 3.1) ***    | 3.1 (2.2, 4.0) ***    | -1.4 (-2.9, 0.2)       | 0.0 (-1.2, 1.2)          |
| Model 2                      | 1.2 (0.5, 2.0) **     | 1.7 (0.8, 2.6) ***    | -1.5 (-3.0, 0.0)       | 1.0 (-0.3, 2.3)          |
| ICAM-1 (n=6248)              |                       |                       |                        |                          |
| Model 1                      | 0.5 (-0.4, 1.4)       | 3.0 (1.9, 4.2) ***    | -1.2 (-3.0, 0.6)       | -4.8 (-6.1, -3.5) ***    |
| Model 2                      | 1.1 (0.2, 2.0) *      | 1.3 (0.3, 2.4) *      | 0.4 (-1.3, 2.2)        | -1.4 (-2.8, 0.0) *       |
| Adiponectin (n=13,893)       |                       |                       |                        |                          |
| Model 1                      | -3.1 (-4.3, -1.9) *** | -6.2 (-7.6, -4.8) *** | -3.9 (-6.2, -1.5) **   | 3.0 (1.1, 4.9) **        |
| Model 2                      | -1.6 (-2.8, -0.3) *   | -3.7 (-5.1, -2.3) *** | -4.1 (-6.4, -1.7) **   | 1.7 (-0.3, 3.7)          |
| Leptin (n=9831)              |                       |                       |                        |                          |
| Model 1                      | -6.4 (-8.4, -4.4) *** | 5.3 (2.7, 8.0) ***    | -9.7 (-13.8, -5.3) *** | -17.3 (-20.2, -14.4) *** |
| Model 2                      | -7.5 (-9.5, -5.4) *** | -0.3 (-2.8, 2.2)      | -8.8 (-12.9, -4.6) *** | -12.5 (-15.7, -9.2) ***  |
| Lipid markers                |                       |                       |                        |                          |
| TC (n=14,979)                |                       |                       |                        |                          |
| Model 1                      | -0.4 (-0.9, 0.0) *    | 0.8 (0.4, 1.3) ***    | -0.1 (-1.0, 0.8)       | -2.2 (-2.9, -1.5) ***    |
| Model 2                      | -0.3 (-0.7, 0.2)      | 0.4 (-0.1, 0.8)       | 0.0 (-0.8, 0.8)        | -1.4 (-2.1, -0.7) ***    |
| HDL-C (n=8623)               |                       |                       |                        |                          |
| Model 1                      | -3.6 (-4.5, -2.7) *** | -4.3 (-5.4, -3.2) *** | 0.5 (-1.4, 2.4)        | 0.3 (-1.0, 1.7)          |
| Model 2                      | -0.7 (-1.7, 0.2)      | -1.7 (-2.8, -0.6) **  | 1.3 (-0.5, 3.1)        | 0.6 (-0.9, 2.0)          |
| LDL-C (n=7169)               |                       |                       |                        |                          |

|                         |                    |                      |                 |                       |
|-------------------------|--------------------|----------------------|-----------------|-----------------------|
| Model 1                 | 0.5 (-0.5, 1.5)    | 2.4 (1.1, 3.6) ***   | 0.6 (-1.4, 2.7) | -2.1 (-3.5, -0.6) **  |
| Model 2                 | 0.2 (-0.7, 1.2)    | 1.4 (0.2, 2.6) *     | 0.5 (-1.4, 2.4) | -1.3 (-2.8, 0.2)      |
| TG (n=10,234)           |                    |                      |                 |                       |
| Model 1                 | 1.6 (0.2, 3.1) *   | 6.1 (4.4, 7.8) ***   | 1.0 (-1.9, 4.1) | -6.0 (-8.2, -3.7) *** |
| Model 2                 | 0.4 (-1.0, 1.8)    | 2.3 (0.7, 4.0) *     | 1.8 (-1.0, 4.7) | -1.4 (-3.8, 1.2)      |
| TG/HDL-C ratio (n=6092) |                    |                      |                 |                       |
| Model 1                 | 5.4 (2.7, 8.1) *** | 10.6 (7.3, 14.1) *** | 1.7 (-3.4, 7.2) | -4.3 (-8.0, -0.5) *   |
| Model 2                 | 2.6 (0.0, 5.3)     | 5.1 (2.0, 8.4) **    | 1.7 (-3.3, 6.9) | -0.5 (-4.6, 3.7)      |

<sup>1</sup> Models were adjusted for the same set of covariates as in Table 2 except BMI was not adjusted in Model 2, and each fructose source was mutually adjusted for other sources. CRP, C-reactive protein; IL-6, interleukin 6; TNF-R1, tumor necrosis factor receptor 1; TNF-R2, tumor necrosis factor receptor 2; ICAM-1, intracellular adhesion molecule 1; TC, total cholesterol; HDL-C, high-density lipoprotein-cholesterol; LDL-C, low-density lipoprotein-cholesterol; TG, triglyceride; ref, reference. \* 0.005≤P<0.05, \*\* 0.001≤P<0.005, \*\*\* P<0.001.

Supplementary Table 7. Percentage of differences (95% CIs) in biomarker concentrations associated with 20 g/d of fructose from SSB, juice and fruit in HPFS <sup>1</sup>

|                              | SSB fructose        | Juice fructose          | Fruit fructose           |
|------------------------------|---------------------|-------------------------|--------------------------|
| Insulinemic/glycemic markers |                     |                         |                          |
| C-peptide (n=3946)           |                     |                         |                          |
| Model 1                      | 5.7 (2.7, 8.7) ***  | 0.6 (-4.7, 6.2)         | -12.4 (-15.5, -9.2) ***  |
| Model 2                      | 5.2 (2.3, 8.1) ***  | 4.1 (-1.2, 9.7)         | -7.8 (-11.3, -4.2) ***   |
| HbA1c (n=1919)               |                     |                         |                          |
| Model 1                      | -0.2 (-0.8, 0.4)    | 0.8 (-0.3, 2.0)         | 0.1 (-0.7, 0.8)          |
| Model 2                      | -0.4 (-1.0, 0.2)    | 1.4 (0.3, 2.6) *        | 0.5 (-0.4, 1.3)          |
| Inflammatory markers         |                     |                         |                          |
| CRP (n=4109)                 |                     |                         |                          |
| Model 1                      | 7.6 (2.3, 13.2) **  | -5.5 (-14.3, 4.3)       | -16.9 (-21.9, -11.6) *** |
| Model 2                      | 3.7 (-1.3, 8.9)     | 3.8 (-5.5, 13.9)        | -5.7 (-11.7, 0.8)        |
| IL-6 (n=2037)                |                     |                         |                          |
| Model 1                      | 0.9 (-2.9, 4.9)     | 3.5 (-4.1, 11.8)        | -8.8 (-13.2, -4.2) ***   |
| Model 2                      | -1.3 (-5.1, 2.6)    | 6.7 (-1.1, 15.1)        | -3.2 (-8.3, 2.2)         |
| TNF-R1 (n=250)               |                     |                         |                          |
| Model 1                      | 0.9 (-3.7, 5.8)     | 5.8 (-5.0, 17.8)        | 1.3 (-4.8, 7.7)          |
| Model 2                      | 0.8 (-4.1, 6.0)     | 3.6 (-7.2, 15.6)        | 1.1 (-5.9, 8.6)          |
| TNF-R2 (n=2126)              |                     |                         |                          |
| Model 1                      | 4.0 (2.4, 5.6) ***  | 0.0 (-3.3, 3.4)         | 0.0 (-2.1, 2.1)          |
| Model 2                      | 3.1 (1.5, 4.8) ***  | -0.3 (-3.5, 3.1)        | 0.7 (-1.6, 3.1)          |
| ICAM-1 (n=2148)              |                     |                         |                          |
| Model 1                      | 3.6 (1.8, 5.5) ***  | 0.7 (-2.5, 3.9)         | -4.7 (-6.6, -2.7) ***    |
| Model 2                      | 1.8 (-0.1, 3.6)     | 2.6 (-0.5, 5.8)         | -2.9 (-5.1, -0.7) *      |
| Adiponectin (n=2455)         |                     |                         |                          |
| Model 1                      | -4.5 (-7.7, -1.1) * | -9.9 (-15.2, -4.4) ***  | 0.5 (-3.5, 4.6)          |
| Model 2                      | -3.4 (-6.7, 0.1)    | -11.2 (-16.2, -5.9) *** | 0.4 (-4.0, 5.0)          |
| Leptin (n=2762)              |                     |                         |                          |
| Model 1                      | 2.4 (-2.4, 7.3)     | -5.8 (-14.1, 3.4)       | -21.7 (-26.2, -17.0) *** |
| Model 2                      | 3.0 (-0.9, 7.1)     | -0.8 (-8.0, 7.0)        | -11.0 (-15.6, -6.1) ***  |
| Lipid markers                |                     |                         |                          |
| TC (n=2612)                  |                     |                         |                          |
| Model 1                      | 1.1 (-0.1, 2.3)     | 1.3 (-1.0, 3.7)         | -2.4 (-3.8, -0.9) **     |
| Model 2                      | 1.3 (0.1, 2.4) *    | 2.1 (-0.1, 4.4)         | -1.0 (-2.5, 0.5)         |
| HDL-C (n=1738)               |                     |                         |                          |
| Model 1                      | -2.6 (-4.7, -0.5) * | -1.2 (-5.4, 3.1)        | -1.3 (-3.8, 1.4)         |
| Model 2                      | -0.8 (-2.8, 1.3)    | -0.8 (-4.7, 3.4)        | -0.4 (-3.1, 2.3)         |
| LDL-C (n=2094)               |                     |                         |                          |
| Model 1                      | 1.6 (-0.5, 3.7)     | 3.3 (-0.7, 7.4)         | -1.1 (-3.5, 1.3)         |

|                         |                    |                  |                  |
|-------------------------|--------------------|------------------|------------------|
| Model 2                 | 1.7 (-0.3, 3.8)    | 3.7 (-0.1, 7.7)  | 0.9 (-1.6, 3.5)  |
| TG (n=1598)             |                    |                  |                  |
| Model 1                 | 5.8 (1.6, 10.1) *  | 2.4 (-5.1, 10.6) | -3.4 (-8.0, 1.4) |
| Model 2                 | 4.4 (0.5, 8.5) *   | 4.2 (-3.2, 12.1) | 0.6 (-4.4, 5.8)  |
| TG/HDL-C ratio (n=1516) |                    |                  |                  |
| Model 1                 | 9.2 (3.2, 15.6) ** | 2.4 (-8.3, 14.4) | -1.8 (-8.4, 5.3) |
| Model 2                 | 6.1 (0.5, 12.0) *  | 4.7 (-5.6, 16.2) | 1.4 (-5.6, 8.9)  |

<sup>1</sup> Models were adjusted for the same set of covariates as in Table 2, and each fructose source was mutually adjusted for other sources. CRP, C-reactive protein; IL-6, interleukin 6; TNF-R1, tumor necrosis factor receptor 1; TNF-R2, tumor necrosis factor receptor 2; ICAM-1, intracellular adhesion molecule 1; TC, total cholesterol; HDL-C, high-density lipoprotein-cholesterol; LDL-C, low-density lipoprotein-cholesterol; TG, triglyceride; ref, reference. \* 0.005≤P<0.05, \*\* 0.001≤P<0.005, \*\*\* P<0.001.

Supplementary Table 8. Percentage of differences (95% CIs) in biomarker concentrations associated with 20 g/d of fructose from SSB, juice and fruit in NHS <sup>1</sup>

|                              | SSB fructose          | Juice fructose       | Fruit fructose           |
|------------------------------|-----------------------|----------------------|--------------------------|
| Insulinemic/glycemic markers |                       |                      |                          |
| C-peptide (n=6550)           |                       |                      |                          |
| Model 1                      | 6.4 (3.1, 9.9) ***    | 0.8 (-3.3, 5.1)      | -10.7 (-13.4, -7.9) ***  |
| Model 2                      | 2.3 (-0.7, 5.3)       | 4.4 (0.5, 8.4) *     | -7.5 (-10.2, -4.6) ***   |
| HbA1c (n=5711)               |                       |                      |                          |
| Model 1                      | -0.2 (-0.6, 0.2)      | 0.4 (-0.1, 1.0)      | -0.4 (-0.8, 0.1)         |
| Model 2                      | -0.6 (-0.9, -0.2) **  | 0.5 (-0.1, 1.0)      | -0.4 (-0.8, 0.1)         |
| Inflammatory markers         |                       |                      |                          |
| CRP (n=9054)                 |                       |                      |                          |
| Model 1                      | 11.9 (6.2, 18.0) ***  | -5.8 (-12.7, 1.7)    | -15.1 (-19.8, -10.1) *** |
| Model 2                      | 6.7 (1.8, 11.9) *     | 6.2 (-0.8, 13.7)     | -7.4 (-12.4, -2.0) *     |
| IL-6 (n=5926)                |                       |                      |                          |
| Model 1                      | 7.4 (3.5, 11.4) ***   | -2.0 (-7.1, 3.4)     | -9.5 (-13.1, -5.7) ***   |
| Model 2                      | 3.3 (-0.4, 7.0)       | 2.6 (-2.5, 8.0)      | -3.9 (-7.9, 0.3)         |
| TNF-R1 (n=1729)              |                       |                      |                          |
| Model 1                      | 2.8 (-0.4, 6.1)       | 1.8 (-2.4, 6.1)      | -0.5 (-3.4, 2.6)         |
| Model 2                      | 0.3 (-2.7, 3.4)       | 3.0 (-0.9, 7.2)      | 0.8 (-2.4, 4.0)          |
| TNF-R2 (n=5847)              |                       |                      |                          |
| Model 1                      | 3.4 (1.7, 5.1) ***    | -1.7 (-3.9, 0.6)     | -0.2 (-2.0, 1.6)         |
| Model 2                      | 1.7 (0.1, 3.3) *      | -0.7 (-2.9, 1.6)     | 0.8 (-1.1, 2.7)          |
| ICAM-1 (n=3130)              |                       |                      |                          |
| Model 1                      | 1.1 (-0.8, 3.0)       | -1.7 (-4.2, 1.0)     | -4.7 (-6.6, -2.6) ***    |
| Model 2                      | 0.2 (-1.5, 1.9)       | 0.3 (-2.2, 2.8)      | -0.2 (-2.3, 2.0)         |
| Adiponectin (n=8100)         |                       |                      |                          |
| Model 1                      | -7.5 (-9.5, -5.5) *** | -2.0 (-5.1, 1.1)     | 3.1 (0.7, 5.4) *         |
| Model 2                      | -5.4 (-7.4, -3.4) *** | -4.3 (-7.1, -1.4) ** | 1.2 (-1.2, 3.7)          |
| Leptin (n=3372)              |                       |                      |                          |
| Model 1                      | 4.0 (-1.2, 9.6)       | -9.0 (-16.0, -1.4) * | -7.5 (-12.9, -1.7) *     |
| Model 2                      | -1.0 (-4.9, 3.0)      | 1.3 (-4.6, 7.6)      | -4.6 (-9.2, 0.2)         |
| Lipid markers                |                       |                      |                          |
| TC (n=6741)                  |                       |                      |                          |
| Model 1                      | 0.8 (-0.1, 1.8)       | 0.3 (-1.0, 1.7)      | -1.5 (-2.5, -0.5) **     |
| Model 2                      | 0.4 (-0.5, 1.2)       | 0.3 (-1.0, 1.5)      | -1.0 (-2.0, 0.0)         |
| HDL-C (n=5565)               |                       |                      |                          |
| Model 1                      | -4.2 (-5.8, -2.6) *** | 0.9 (-1.4, 3.3)      | 0.7 (-1.1, 2.5)          |
| Model 2                      | -2.0 (-3.5, -0.4) *   | 0.6 (-1.5, 2.8)      | 0.5 (-1.3, 2.3)          |
| LDL-C (n=3757)               |                       |                      |                          |
| Model 1                      | 2.1 (0.1, 4.1) *      | -0.4 (-3.1, 2.4)     | -2.6 (-4.6, -0.6) *      |



|                         |                   |                    |                     |
|-------------------------|-------------------|--------------------|---------------------|
| Model 2                 | 1.2 (-0.6, 3.1)   | -0.7 (-3.3, 1.8)   | -2.8 (-4.8, -0.7) * |
| TG (n=4428)             |                   |                    |                     |
| Model 1                 | 5.0 (1.8, 8.2) ** | 4.6 (-0.1, 9.4)    | -4.0 (-7.3, -0.6) * |
| Model 2                 | 3.5 (0.6, 6.5) *  | 6.8 (2.4, 11.3) ** | 0.1 (-3.5, 3.7)     |
| TG/HDL-C ratio (n=3293) |                   |                    |                     |
| Model 1                 | 6.0 (1.0, 11.2) * | 2.2 (-4.6, 9.5)    | -3.1 (-8.2, 2.3)    |
| Model 2                 | 3.5 (-1.0, 8.2)   | 5.0 (-1.5, 11.8)   | 1.9 (-3.5, 7.7)     |

<sup>1</sup> Models were adjusted for the same set of covariates as in Table 2, and each fructose source was mutually adjusted for other sources. CRP, C-reactive protein; IL-6, interleukin 6; TNF-R1, tumor necrosis factor receptor 1; TNF-R2, tumor necrosis factor receptor 2; ICAM-1, intracellular adhesion molecule 1; TC, total cholesterol; HDL-C, high-density lipoprotein-cholesterol; LDL-C, low-density lipoprotein-cholesterol; TG, triglyceride; ref, reference. \* 0.005≤P<0.05, \*\* 0.001≤P<0.005, \*\*\* P<0.001.

Supplementary Table 9. Percentage of differences (95% CIs) in biomarker concentrations associated with 20 g/d of fructose from SSB, juice and fruit in NHSII <sup>1</sup>

|                              | SSB fructose          | Juice fructose          | Fruit fructose           |
|------------------------------|-----------------------|-------------------------|--------------------------|
| Insulinemic/glycemic markers |                       |                         |                          |
| C-peptide (n=1937)           |                       |                         |                          |
| Model 1                      | 6.4 (2.8, 10.1) ***   | -4.6 (-10.7, 1.9)       | -10.6 (-15.4, -5.5) ***  |
| Model 2                      | 2.5 (-0.7, 5.9)       | 3.2 (-3.1, 9.9)         | -3.1 (-8.3, 2.4)         |
| HbA1c (n=2282)               |                       |                         |                          |
| Model 1                      | 0.4 (0.1, 0.7) *      | -0.4 (-1.1, 0.4)        | -1.0 (-1.7, -0.4) **     |
| Model 2                      | 0.1 (-0.2, 0.4)       | 0.2 (-0.5, 0.8)         | -0.2 (-0.9, 0.4)         |
| Inflammatory markers         |                       |                         |                          |
| CRP (n=3647)                 |                       |                         |                          |
| Model 1                      | 17.1 (10.9, 23.6) *** | -17.6 (-26.9, -7.0) **  | -32.0 (-38.7, -24.4) *** |
| Model 2                      | 9.0 (3.8, 14.5) ***   | -1.7 (-11.4, 9.0)       | -14.0 (-22.1, -5.1) **   |
| IL-6 (n=3048)                |                       |                         |                          |
| Model 1                      | 6.7 (3.7, 9.8) ***    | -7.6 (-13.2, -1.7) *    | -11.9 (-16.6, -6.8) ***  |
| Model 2                      | 3.3 (0.5, 6.1) *      | -0.9 (-6.4, 4.9)        | -3.6 (-8.8, 1.9)         |
| TNF-R1 (n=1335)              |                       |                         |                          |
| Model 1                      | 1.3 (-0.5, 3.1)       | -2.3 (-5.7, 1.2)        | -2.6 (-5.7, 0.6)         |
| Model 2                      | -0.1 (-1.8, 1.7)      | -0.7 (-4.0, 2.7)        | -1.3 (-4.6, 2.1)         |
| TNF-R2 (n=2735)              |                       |                         |                          |
| Model 1                      | 2.2 (1.0, 3.4) ***    | -1.7 (-4.0, 0.8)        | 0.0 (-2.2, 2.2)          |
| Model 2                      | 0.8 (-0.4, 2.1)       | 0.0 (-2.3, 2.3)         | 2.8 (0.5, 5.3) *         |
| ICAM-1 (n=970)               |                       |                         |                          |
| Model 1                      | 5.0 (3.1, 7.0) ***    | -3.6 (-7.4, 0.4)        | -5.6 (-8.9, -2.2) **     |
| Model 2                      | 2.5 (0.6, 4.5) *      | -1.3 (-5.0, 2.4)        | -0.5 (-4.0, 3.2)         |
| Adiponectin (n=3338)         |                       |                         |                          |
| Model 1                      | -5.7 (-8.1, -3.2) *** | -3.2 (-8.1, 2.0)        | 5.2 (0.6, 10.0) *        |
| Model 2                      | -3.2 (-5.6, -0.7) *   | -8.0 (-12.6, -3.2) **   | -1.4 (-5.8, 3.2)         |
| Leptin (n=3697)              |                       |                         |                          |
| Model 1                      | 7.6 (3.8, 11.4) ***   | -13.1 (-19.4, -6.4) *** | -22.2 (-26.9, -17.2) *** |
| Model 2                      | 2.7 (-0.3, 5.8)       | 1.4 (-4.5, 7.6)         | -10.0 (-14.7, -5.0) ***  |
| Lipid markers                |                       |                         |                          |
| TC (n=5626)                  |                       |                         |                          |
| Model 1                      | 0.6 (0.0, 1.2)        | -1.3 (-2.7, 0.1)        | -2.9 (-4.2, -1.7) ***    |
| Model 2                      | 0.0 (-0.6, 0.6)       | -0.3 (-1.6, 0.9)        | -1.6 (-2.9, -0.4) *      |
| HDL-C (n=1320)               |                       |                         |                          |
| Model 1                      | -6.0 (-8.0, -4.0) *** | 1.0 (-3.1, 5.2)         | 2.2 (-1.4, 6.0)          |
| Model 2                      | -3.6 (-5.5, -1.7) *** | 0.8 (-2.8, 4.5)         | 0.0 (-3.4, 3.6)          |
| LDL-C (n=1318)               |                       |                         |                          |
| Model 1                      | 3.1 (0.9, 5.5) *      | -1.5 (-5.8, 2.9)        | -2.2 (-5.9, 1.6)         |

|                         |                       |                   |                        |
|-------------------------|-----------------------|-------------------|------------------------|
| Model 2                 | 2.0 (-0.2, 4.2)       | -0.4 (-4.3, 3.7)  | 1.1 (-2.7, 5.0)        |
| TG (n=4208)             |                       |                   |                        |
| Model 1                 | 6.0 (3.7, 8.3) ***    | -3.1 (-7.3, 1.3)  | -9.3 (-13.2, -5.3) *** |
| Model 2                 | 1.8 (-0.3, 3.9)       | 3.3 (-0.7, 7.5)   | -0.7 (-4.7, 3.5)       |
| TG/HDL-C ratio (n=1283) |                       |                   |                        |
| Model 1                 | 16.7 (10.4, 23.3) *** | -3.4 (-13.2, 7.6) | -11.3 (-19.3, -2.5) *  |
| Model 2                 | 8.8 (3.4, 14.5) **    | 0.8 (-8.0, 10.5)  | -2.9 (-11.1, 6.1)      |

<sup>1</sup> Models were adjusted for the same set of covariates as in Table 2, and each fructose source was mutually adjusted for other sources. CRP, C-reactive protein; IL-6, interleukin 6; TNF-R1, tumor necrosis factor receptor 1; TNF-R2, tumor necrosis factor receptor 2; ICAM-1, intracellular adhesion molecule 1; TC, total cholesterol; HDL-C, high-density lipoprotein-cholesterol; LDL-C, low-density lipoprotein-cholesterol; TG, triglyceride; ref, reference. \* 0.005≤P<0.05, \*\* 0.001≤P<0.005, \*\*\* P<0.001.
